# Supplementary material
Source: Research Square preprint supplement (doi:10.21203/rs.3.rs-10175812/v1)
Supplement: Supplementary file 1 [file 7e1ad0296d1ff0250472e3f1.pdf]

# 1 **Supplementary Information**

## 2 **A z-averaged ensemble of three orthogonal models** 3 **improves protein-ligand virtual screening on leakage-** 4 **controlled benchmarks**

5 Yuguang Mu, Yang Liu, and Weifeng Li

6 Corresponding authors: Yuguang Mu, Weifeng Li. Email: ygmu@ntu.edu.sg;  
7 lwf@mail.sdu.edu.cn

8

---

### 9 **This PDF file includes:**

- 10 • Supplementary Note 1 (external validation on the MUV benchmark)
- 11 • Supplementary Fig. 1
- 12 • Supplementary Tables 1 to 5
- 13 • SI References

14

---

### 15 **Supplementary Table 1. BIND-full as an industry reference baseline** 16 **(not zero-shot)**

17 BIND-full was fine-tuned with per-target actives present in each  
18 benchmark's test set; we report it for completeness but it is **not directly**  
19 **comparable** to the zero-shot models in Figure 2.

| Benchmark                  | n   | 3-way ens.         |                                |        |  |
|----------------------------|-----|--------------------|--------------------------------|--------|--|
|                            |     | AUROC              | $\Delta$ (BIND-full<br>– ens3) |        |  |
|                            |     | BIND-full<br>AUROC | AUROC<br>(zero-shot)           |        |  |
| DUD-<br>E_uniprot<br>full  | 102 | 0.945              | 0.858                          | +0.087 |  |
| DUD-<br>AD_uniprot<br>full | 102 | 0.927              | 0.811                          | +0.117 |  |
| DUD-E-strict               | 7   | 0.946              | 0.779                          | +0.167 |  |
| DUD-AD-<br>strict          | 7   | 0.930              | 0.755                          | +0.175 |  |
| bdb_strict_te<br>st        | 33  | —                  | pending                        | —      |  |
| LIT-PCBA                   | 14  | 0.609              | 0.608                          | +0.001 |  |

20 *BIND-full's apparent advantage on DUD-E/DUD-AD subsets is driven by in-*  
21 *distribution memorization of test-target actives, not by superior modeling.*  
22 *Under the leakage-clean bdb\_strict\_test split, BIND-full was not run*  
23 *because the training data contains the strict-test targets by construction.*

24 **Supplementary Table 2. Per-target AUROC across six benchmarks**

25 *DUD-E (102)*

| Target | BIND-z | BIND-  | SaProt- | DrugCLI | ens2   | ens3   |
|--------|--------|--------|---------|---------|--------|--------|
|        |        | full   | v2      | P       |        |        |
| aa2ar  | 0.9520 | 0.9948 | 0.7663  | 0.8855  | 0.9568 | 0.9684 |
| abl1   | 0.9288 | 0.9720 | 0.7752  | 0.4491  | 0.9304 | 0.8834 |
| ace    | 0.8840 | 0.9914 | 0.8631  | 0.4103  | 0.9201 | 0.8518 |
| aces   | 0.9742 | 0.9707 | 0.3628  | 0.9242  | 0.9074 | 0.9625 |
| ada    | 0.9954 | 0.9976 | 0.6437  | 0.8385  | 0.9823 | 0.9913 |
| ada17  | 0.8484 | 0.9813 | 0.9714  | 0.4536  | 0.9459 | 0.9333 |
| adrb1  | 0.9739 | 0.9678 | 0.7525  | 0.7817  | 0.9594 | 0.9391 |
| adrb2  | 0.9628 | 0.9514 | 0.7548  | 0.6910  | 0.9517 | 0.9633 |
| akt1   | 0.9357 | 0.9546 | 0.7853  | 0.7318  | 0.9135 | 0.8776 |
| akt2   | 0.9462 | 0.9692 | 0.7437  | 0.6321  | 0.9390 | 0.9190 |
| aldr   | 0.8791 | 0.9559 | 0.3517  | 0.4529  | 0.6890 | 0.6273 |
| ampc   | 0.7733 | 0.8785 | 0.8081  | 0.6266  | 0.8465 | 0.8477 |
| andr   | 0.5674 | 0.9295 | 0.7430  | 0.6484  | 0.7200 | 0.7397 |
| aofb   | 0.8656 | 0.8795 | 0.4987  | 0.5099  | 0.7411 | 0.6925 |
| bace1  | 0.9343 | 0.9722 | 0.7306  | 0.7645  | 0.9105 | 0.9111 |
| braf   | 0.9506 | 0.9812 | 0.8520  | 0.6198  | 0.9372 | 0.8901 |
| cah2   | 0.9940 | 0.9958 | 0.9553  | 0.3225  | 0.9942 | 0.9787 |

|       |        |        |        |        |        |        |
|-------|--------|--------|--------|--------|--------|--------|
| casp3 | 0.9205 | 0.9205 | 0.7134 | 0.8209 | 0.8878 | 0.9318 |
| cdk2  | 0.8994 | 0.9121 | 0.7670 | 0.6259 | 0.9102 | 0.8769 |
| comt  | 0.7912 | 0.9933 | 0.8343 | 0.8887 | 0.8764 | 0.9689 |
| cp2c9 | 0.5072 | 0.8042 | 0.5528 | 0.5126 | 0.5423 | 0.5457 |
| cp3a4 | 0.5730 | 0.8180 | 0.5594 | 0.3852 | 0.5633 | 0.5320 |
| csf1r | 0.9223 | 0.9764 | 0.8069 | 0.6298 | 0.9182 | 0.9162 |
| cxcr4 | 0.4039 | 0.9093 | 0.7002 | 0.5801 | 0.5956 | 0.5860 |
| def   | 0.9967 | 0.9997 | 0.8613 | 0.8158 | 0.9974 | 0.9981 |
| dhi1  | 0.8933 | 0.9726 | 0.5274 | 0.4808 | 0.8386 | 0.8061 |
| dpp4  | 0.9310 | 0.9855 | 0.8698 | 0.3102 | 0.9424 | 0.9065 |
| drd3  | 0.9731 | 0.9896 | 0.9248 | 0.8329 | 0.9746 | 0.9719 |
| dyr   | 0.9837 | 0.9941 | 0.9446 | 0.9773 | 0.9865 | 0.9896 |
| egfr  | 0.9285 | 0.9852 | 0.8380 | 0.6361 | 0.9380 | 0.9389 |
| esr1  | 0.9214 | 0.9903 | 0.8753 | 0.9409 | 0.9315 | 0.9531 |
| esr2  | 0.8861 | 0.9894 | 0.7887 | 0.9603 | 0.9042 | 0.9512 |
| fa10  | 0.8884 | 0.9938 | 0.8169 | 0.6213 | 0.9041 | 0.9110 |
| fa7   | 0.9039 | 0.9744 | 0.8829 | 0.3417 | 0.9386 | 0.9027 |
| fabp4 | 0.9320 | 0.9720 | 0.5345 | 0.8136 | 0.8587 | 0.9041 |
| fak1  | 0.9878 | 0.9570 | 0.9653 | 0.5478 | 0.9972 | 0.9906 |
| fgfr1 | 0.9704 | 0.9723 | 0.9129 | 0.4334 | 0.9748 | 0.9616 |

|        |        |        |        |        |        |        |
|--------|--------|--------|--------|--------|--------|--------|
| fkbl1a | 0.8799 | 0.9797 | 0.7230 | 0.9780 | 0.8803 | 0.9746 |
| fnta   | 0.9941 | 0.9966 | 0.5377 | 0.9079 | 0.9796 | 0.9903 |
| fpps   | 0.9994 | 1.0000 | 0.9995 | 0.8498 | 0.9999 | 0.9996 |
| gcr    | 0.5378 | 0.9675 | 0.8615 | 0.7174 | 0.7903 | 0.7980 |
| glcm   | 0.7985 | 0.9192 | 0.8180 | 0.5219 | 0.8016 | 0.8158 |
| gria2  | 0.8981 | 0.8346 | 0.3175 | 0.6101 | 0.6805 | 0.6847 |
| grik1  | 0.9484 | 0.9159 | 0.2387 | 0.9240 | 0.7315 | 0.8747 |
| hdac2  | 0.9984 | 0.9925 | 0.8614 | 0.9554 | 0.9985 | 0.9960 |
| hdac8  | 0.9979 | 0.9935 | 0.9620 | 0.9634 | 0.9976 | 0.9953 |
| hivint | 0.4769 | 0.6722 | 0.4212 | 0.8652 | 0.4436 | 0.7049 |
| hivpr  | 0.3693 | 0.6985 | 0.7196 | 0.6050 | 0.6008 | 0.6447 |
| hivrt  | 0.4277 | 0.4816 | 0.6040 | 0.2520 | 0.5380 | 0.3582 |
| hmdh   | 0.6993 | 0.9996 | 0.3889 | 0.5652 | 0.5848 | 0.6008 |
| hs90a  | 0.9710 | 0.9977 | 0.7578 | 0.9044 | 0.9711 | 0.9849 |
| hvk4   | 0.4643 | 0.9966 | 0.1670 | 0.6563 | 0.2443 | 0.3503 |
| igf1r  | 0.9226 | 0.9874 | 0.9250 | 0.6283 | 0.9600 | 0.9557 |
| inha   | 0.8578 | 0.9237 | 0.7625 | 0.6068 | 0.8525 | 0.7789 |
| ital   | 0.5738 | 0.9002 | 0.5798 | 0.5726 | 0.6343 | 0.6408 |
| jak2   | 0.9117 | 0.9841 | 0.9073 | 0.5974 | 0.9671 | 0.9497 |
| kif11  | 0.5223 | 0.9333 | 0.4905 | 0.5974 | 0.5126 | 0.5516 |

|       |        |        |        |        |        |        |
|-------|--------|--------|--------|--------|--------|--------|
| kit   | 0.9209 | 0.9847 | 0.8963 | 0.6704 | 0.9545 | 0.9392 |
| kith  | 0.8264 | 0.8176 | 0.3554 | 0.5167 | 0.6981 | 0.6734 |
| kpcb  | 0.9534 | 0.9557 | 0.9194 | 0.8170 | 0.9720 | 0.9739 |
| lck   | 0.9615 | 0.9862 | 0.8829 | 0.5070 | 0.9662 | 0.9404 |
| lkha4 | 0.3891 | 0.9917 | 0.6156 | 0.7707 | 0.4970 | 0.6744 |
| mapk2 | 0.8620 | 0.9662 | 0.8919 | 0.6061 | 0.9064 | 0.8736 |
| mcr   | 0.6484 | 0.9415 | 0.8104 | 0.6595 | 0.7936 | 0.8096 |
| met   | 0.8250 | 0.9844 | 0.7677 | 0.1715 | 0.8610 | 0.7597 |
| mk01  | 0.8024 | 0.9292 | 0.8840 | 0.7203 | 0.9252 | 0.9336 |
| mk10  | 0.7919 | 0.9304 | 0.7174 | 0.6939 | 0.8022 | 0.8429 |
| mk14  | 0.8929 | 0.9710 | 0.6277 | 0.7202 | 0.8651 | 0.9023 |
| mmp13 | 0.9676 | 0.9956 | 0.9430 | 0.2341 | 0.9819 | 0.9662 |
| mp2k1 | 0.9183 | 0.9619 | 0.7874 | 0.6556 | 0.9280 | 0.9257 |
| nos1  | 0.7850 | 0.9097 | 0.5550 | 0.8338 | 0.7353 | 0.8362 |
| nram  | 0.9634 | 0.9953 | 0.7090 | 0.9877 | 0.9495 | 0.9911 |
| pa2ga | 0.8046 | 0.7974 | 0.4076 | 0.7221 | 0.6651 | 0.7606 |
| parp1 | 0.7043 | 0.9639 | 0.8876 | 0.9337 | 0.8800 | 0.9618 |
| pde5a | 0.9007 | 0.9591 | 0.7727 | 0.7584 | 0.8954 | 0.9134 |
| pgh1  | 0.7993 | 0.9003 | 0.5633 | 0.6119 | 0.7599 | 0.7600 |
| pgh2  | 0.9032 | 0.9334 | 0.5534 | 0.6612 | 0.8656 | 0.8632 |

|       |        |        |        |        |        |        |
|-------|--------|--------|--------|--------|--------|--------|
| plk1  | 0.9078 | 0.9101 | 0.8465 | 0.4280 | 0.9245 | 0.8909 |
| pnph  | 0.9033 | 0.9577 | 0.7856 | 0.9840 | 0.9296 | 0.9884 |
| ppara | 0.5192 | 0.9873 | 0.9362 | 0.9705 | 0.8321 | 0.9550 |
| ppard | 0.7298 | 0.9890 | 0.9582 | 0.9587 | 0.9106 | 0.9656 |
| pparg | 0.4531 | 0.9493 | 0.8309 | 0.9328 | 0.7185 | 0.9047 |
| prgr  | 0.6258 | 0.9474 | 0.6627 | 0.7642 | 0.6692 | 0.7789 |
| ptn1  | 0.9171 | 0.9194 | 0.5707 | 0.8857 | 0.8005 | 0.9016 |
| pur2  | 0.8627 | 0.9849 | 0.6895 | 0.9280 | 0.8711 | 0.9639 |
| pygm  | 0.5614 | 0.9767 | 0.4279 | 0.6579 | 0.5179 | 0.5864 |
| pyrd  | 0.7546 | 0.9698 | 0.4868 | 0.4974 | 0.6596 | 0.6131 |
| reni  | 0.8899 | 0.9456 | 0.7792 | 0.5514 | 0.8834 | 0.9043 |
| rock1 | 0.9440 | 0.9847 | 0.8090 | 0.7410 | 0.9386 | 0.9770 |
| rxra  | 0.8591 | 0.9739 | 0.9706 | 0.7747 | 0.9429 | 0.9395 |
| sahh  | 0.5749 | 0.9978 | 0.7829 | 0.4559 | 0.7546 | 0.6722 |
| src   | 0.9571 | 0.9866 | 0.6893 | 0.6641 | 0.9337 | 0.9308 |
| tgfr1 | 0.9786 | 0.9990 | 0.6346 | 0.7814 | 0.9363 | 0.9654 |
| thb   | 0.8719 | 0.9579 | 0.7569 | 0.6948 | 0.8665 | 0.8691 |
| thrb  | 0.7001 | 0.9795 | 0.8292 | 0.5313 | 0.8027 | 0.7840 |
| try1  | 0.9660 | 0.9679 | 0.9177 | 0.4075 | 0.9654 | 0.9459 |
| tryb1 | 0.9337 | 0.9619 | 0.7899 | 0.7141 | 0.9389 | 0.9328 |

|       |        |        |        |        |        |        |
|-------|--------|--------|--------|--------|--------|--------|
| tysy  | 0.7650 | 0.8301 | 0.5884 | 0.8639 | 0.7159 | 0.8485 |
| urok  | 0.9492 | 0.9849 | 0.7885 | 0.5531 | 0.9541 | 0.9345 |
| vgfr2 | 0.9660 | 0.9841 | 0.8741 | 0.2937 | 0.9785 | 0.8921 |
| wee1  | 0.9595 | 0.7881 | 0.7001 | 0.6002 | 0.9362 | 0.9352 |
| xiap  | 0.9956 | 0.9842 | 0.7188 | 0.3643 | 0.9752 | 0.9538 |

26 *DUD-AD (102)*

| Target | BIND-z | BIND-<br>full | SaProt-<br>v2 | DrugCLI<br>P | ens2   | ens3   |
|--------|--------|---------------|---------------|--------------|--------|--------|
| aa2ar  | 0.9434 | 0.9923        | 0.7354        | 0.8620       | 0.9385 | 0.9523 |
| abl1   | 0.8963 | 0.9519        | 0.6210        | 0.5183       | 0.8469 | 0.8099 |
| ace    | 0.8054 | 0.9952        | 0.9329        | 0.6255       | 0.9563 | 0.9382 |
| aces   | 0.9763 | 0.9656        | 0.5591        | 0.9072       | 0.9397 | 0.9668 |
| ada    | 0.9899 | 0.9902        | 0.7144        | 0.8508       | 0.9729 | 0.9851 |
| ada17  | 0.8623 | 0.9825        | 0.9590        | 0.4892       | 0.9443 | 0.9322 |
| adrb1  | 0.9844 | 0.9868        | 0.8290        | 0.8586       | 0.9765 | 0.9683 |
| adrb2  | 0.9825 | 0.9887        | 0.8088        | 0.7859       | 0.9742 | 0.9819 |
| akt1   | 0.8730 | 0.9412        | 0.7628        | 0.7699       | 0.8594 | 0.8547 |
| akt2   | 0.8263 | 0.9458        | 0.6929        | 0.6901       | 0.8326 | 0.8459 |
| aldr   | 0.8544 | 0.9354        | 0.5545        | 0.2981       | 0.7831 | 0.6249 |
| ampc   | 0.6446 | 0.7477        | 0.7438        | 0.6794       | 0.7384 | 0.7754 |

|       |        |        |        |        |        |        |
|-------|--------|--------|--------|--------|--------|--------|
| andr  | 0.6750 | 0.8622 | 0.5376 | 0.6622 | 0.6449 | 0.6901 |
| aofb  | 0.8171 | 0.8589 | 0.6094 | 0.4801 | 0.7731 | 0.6919 |
| bace1 | 0.9010 | 0.9692 | 0.6402 | 0.8144 | 0.8534 | 0.8916 |
| braf  | 0.8474 | 0.9532 | 0.6090 | 0.5938 | 0.7678 | 0.7262 |
| cah2  | 0.9894 | 0.9863 | 0.8742 | 0.3912 | 0.9836 | 0.9548 |
| casp3 | 0.9312 | 0.9380 | 0.6799 | 0.8046 | 0.8933 | 0.9319 |
| cdk2  | 0.8080 | 0.8605 | 0.5685 | 0.6759 | 0.7603 | 0.7803 |
| comt  | 0.7889 | 0.9482 | 0.6870 | 0.8673 | 0.8215 | 0.9208 |
| cp2c9 | 0.4806 | 0.6587 | 0.5459 | 0.4565 | 0.5238 | 0.4979 |
| cp3a4 | 0.5779 | 0.7567 | 0.6253 | 0.4193 | 0.6056 | 0.5749 |
| csf1r | 0.8339 | 0.9502 | 0.7186 | 0.6320 | 0.8262 | 0.8236 |
| cxcr4 | 0.4515 | 0.8049 | 0.7188 | 0.5649 | 0.6429 | 0.6369 |
| def   | 0.9905 | 0.9968 | 0.8095 | 0.8325 | 0.9892 | 0.9912 |
| dhi1  | 0.8215 | 0.9597 | 0.5384 | 0.5708 | 0.7674 | 0.7697 |
| dpp4  | 0.9444 | 0.9943 | 0.9196 | 0.3252 | 0.9628 | 0.9337 |
| drd3  | 0.9746 | 0.9929 | 0.9441 | 0.8273 | 0.9804 | 0.9781 |
| dyr   | 0.9854 | 0.9962 | 0.9488 | 0.9578 | 0.9879 | 0.9884 |
| egfr  | 0.8920 | 0.9784 | 0.6002 | 0.5899 | 0.8355 | 0.8238 |
| esr1  | 0.7770 | 0.9760 | 0.6012 | 0.9177 | 0.7323 | 0.8473 |
| esr2  | 0.7654 | 0.9764 | 0.4420 | 0.9433 | 0.6594 | 0.8413 |

|        |        |        |        |        |        |        |
|--------|--------|--------|--------|--------|--------|--------|
| fa10   | 0.8592 | 0.9883 | 0.6826 | 0.5159 | 0.8207 | 0.8172 |
| fa7    | 0.8112 | 0.9302 | 0.6544 | 0.2013 | 0.7883 | 0.6150 |
| fabp4  | 0.9575 | 0.9972 | 0.6669 | 0.8881 | 0.9184 | 0.9705 |
| fak1   | 0.9868 | 0.9721 | 0.8357 | 0.6985 | 0.9811 | 0.9767 |
| fgfr1  | 0.9241 | 0.9218 | 0.7475 | 0.5686 | 0.9033 | 0.8864 |
| fkbl1a | 0.7466 | 0.9542 | 0.5356 | 0.9659 | 0.6901 | 0.9044 |
| fnta   | 0.9844 | 0.9891 | 0.5378 | 0.8791 | 0.9506 | 0.9687 |
| fpps   | 0.7790 | 0.9323 | 0.4345 | 0.5109 | 0.6390 | 0.6106 |
| gcr    | 0.5731 | 0.9095 | 0.6338 | 0.7299 | 0.6425 | 0.7086 |
| glcm   | 0.7172 | 0.8420 | 0.7780 | 0.5197 | 0.7565 | 0.7340 |
| gria2  | 0.8482 | 0.8627 | 0.4236 | 0.5067 | 0.6872 | 0.6458 |
| grik1  | 0.9565 | 0.9298 | 0.2890 | 0.9342 | 0.8153 | 0.9145 |
| hdac2  | 0.9946 | 0.9848 | 0.8240 | 0.9464 | 0.9899 | 0.9892 |
| hdac8  | 0.9904 | 0.9854 | 0.9359 | 0.9580 | 0.9886 | 0.9890 |
| hivint | 0.5787 | 0.7137 | 0.3581 | 0.7649 | 0.4529 | 0.6280 |
| hivpr  | 0.4723 | 0.7528 | 0.5310 | 0.6385 | 0.5236 | 0.6077 |
| hivrt  | 0.5116 | 0.5392 | 0.5088 | 0.3453 | 0.5260 | 0.4202 |
| hmdh   | 0.5903 | 0.9914 | 0.5219 | 0.3349 | 0.5887 | 0.4837 |
| hs90a  | 0.9454 | 0.9921 | 0.6180 | 0.8609 | 0.9226 | 0.9531 |
| hvk4   | 0.4924 | 0.9783 | 0.3710 | 0.6055 | 0.4022 | 0.4684 |

|       |        |        |        |        |        |        |
|-------|--------|--------|--------|--------|--------|--------|
| igf1r | 0.7896 | 0.9664 | 0.8115 | 0.7448 | 0.8588 | 0.9109 |
| inha  | 0.7608 | 0.8660 | 0.6570 | 0.6498 | 0.7385 | 0.7144 |
| ital  | 0.6228 | 0.8954 | 0.5708 | 0.3485 | 0.6564 | 0.5444 |
| jak2  | 0.8001 | 0.9161 | 0.7066 | 0.6189 | 0.8367 | 0.8456 |
| kif11 | 0.5970 | 0.9335 | 0.4273 | 0.5669 | 0.5380 | 0.5599 |
| kit   | 0.8500 | 0.9565 | 0.8013 | 0.5960 | 0.8885 | 0.8565 |
| kith  | 0.7738 | 0.7916 | 0.5800 | 0.5837 | 0.7624 | 0.7386 |
| kpcb  | 0.9140 | 0.9229 | 0.9167 | 0.7593 | 0.9585 | 0.9544 |
| lck   | 0.9003 | 0.9712 | 0.6345 | 0.5914 | 0.8485 | 0.8334 |
| lkha4 | 0.3664 | 0.9967 | 0.6753 | 0.5536 | 0.5119 | 0.5807 |
| mapk2 | 0.7671 | 0.9263 | 0.7964 | 0.6745 | 0.8110 | 0.8118 |
| mcr   | 0.6200 | 0.8470 | 0.5308 | 0.7059 | 0.5930 | 0.6765 |
| met   | 0.7053 | 0.9759 | 0.7162 | 0.2758 | 0.7665 | 0.6787 |
| mk01  | 0.6345 | 0.8896 | 0.7885 | 0.7816 | 0.7946 | 0.8756 |
| mk10  | 0.7659 | 0.9206 | 0.5824 | 0.6925 | 0.7271 | 0.7953 |
| mk14  | 0.7864 | 0.9198 | 0.5962 | 0.7273 | 0.7695 | 0.8441 |
| mmp13 | 0.9608 | 0.9939 | 0.9311 | 0.2505 | 0.9773 | 0.9637 |
| mp2k1 | 0.9046 | 0.9528 | 0.6082 | 0.5665 | 0.8769 | 0.8591 |
| nos1  | 0.6846 | 0.8896 | 0.5371 | 0.6301 | 0.6445 | 0.6713 |
| nram  | 0.9681 | 0.9576 | 0.5896 | 0.9832 | 0.9363 | 0.9860 |

|       |        |        |        |        |        |        |
|-------|--------|--------|--------|--------|--------|--------|
| pa2ga | 0.8259 | 0.7994 | 0.5786 | 0.7315 | 0.7770 | 0.8257 |
| parp1 | 0.5360 | 0.9600 | 0.8207 | 0.9253 | 0.7446 | 0.9135 |
| pde5a | 0.8273 | 0.9406 | 0.7208 | 0.7484 | 0.8296 | 0.8654 |
| pgh1  | 0.7663 | 0.8948 | 0.5195 | 0.6336 | 0.7004 | 0.7204 |
| pgh2  | 0.8786 | 0.9260 | 0.5614 | 0.6250 | 0.8415 | 0.8285 |
| plk1  | 0.8570 | 0.9305 | 0.7796 | 0.4453 | 0.8714 | 0.8302 |
| pnph  | 0.7517 | 0.9407 | 0.7662 | 0.9768 | 0.8267 | 0.9671 |
| ppara | 0.5240 | 0.9939 | 0.7037 | 0.9597 | 0.6420 | 0.8902 |
| ppard | 0.5722 | 0.9845 | 0.7851 | 0.9024 | 0.7154 | 0.8573 |
| pparg | 0.4804 | 0.9387 | 0.6843 | 0.9075 | 0.6070 | 0.8505 |
| prgr  | 0.6394 | 0.9126 | 0.4836 | 0.7995 | 0.5733 | 0.7369 |
| ptn1  | 0.9299 | 0.8840 | 0.7226 | 0.8453 | 0.8816 | 0.9073 |
| pur2  | 0.9039 | 0.9909 | 0.5406 | 0.9825 | 0.8506 | 0.9785 |
| pygm  | 0.5659 | 0.9869 | 0.6368 | 0.6221 | 0.6682 | 0.6987 |
| pyrd  | 0.6622 | 0.9627 | 0.5958 | 0.4748 | 0.6567 | 0.6096 |
| reni  | 0.8179 | 0.9342 | 0.6779 | 0.7393 | 0.7789 | 0.8737 |
| rock1 | 0.8519 | 0.9457 | 0.8008 | 0.8641 | 0.8849 | 0.9637 |
| rxra  | 0.8182 | 0.9521 | 0.8859 | 0.6060 | 0.8702 | 0.8428 |
| sahh  | 0.3531 | 0.9929 | 0.6227 | 0.4336 | 0.4903 | 0.4528 |
| src   | 0.9227 | 0.9762 | 0.5035 | 0.6460 | 0.8423 | 0.8488 |

|       |        |        |        |        |        |        |
|-------|--------|--------|--------|--------|--------|--------|
| tgfr1 | 0.7846 | 0.9464 | 0.3844 | 0.8193 | 0.6190 | 0.8043 |
| thb   | 0.8012 | 0.9093 | 0.6338 | 0.5622 | 0.7559 | 0.7231 |
| thrb  | 0.7786 | 0.9796 | 0.7349 | 0.5832 | 0.8189 | 0.8106 |
| try1  | 0.9498 | 0.9529 | 0.8183 | 0.3853 | 0.9337 | 0.8993 |
| tryb1 | 0.9068 | 0.9408 | 0.5751 | 0.6263 | 0.8426 | 0.8288 |
| tysy  | 0.8212 | 0.8745 | 0.5877 | 0.7236 | 0.7557 | 0.8094 |
| urok  | 0.9490 | 0.9875 | 0.5762 | 0.5894 | 0.9133 | 0.8969 |
| vgfr2 | 0.8678 | 0.9467 | 0.7239 | 0.3615 | 0.8690 | 0.7554 |
| wee1  | 0.9307 | 0.7218 | 0.3271 | 0.7053 | 0.8004 | 0.8584 |
| xiap  | 0.9897 | 0.9917 | 0.6481 | 0.3273 | 0.9658 | 0.9367 |

27 *bdb\_strict\_test (33)*

| Target | BIND-z | BIND-<br>full | SaProt-<br>v2 | DrugCLI<br>P | ens2   | ens3   |
|--------|--------|---------------|---------------|--------------|--------|--------|
| A0A0D9 | 0.6654 | 0.9983        | 0.8723        | 0.9103       | 0.8403 | 0.9326 |
| RHK8   |        |               |               |              |        |        |
| O14757 | 0.8204 | 0.9791        | 0.8281        | 0.4266       | 0.8719 | 0.7970 |
| O15530 | 0.9086 | 0.9645        | 0.7255        | 0.7426       | 0.8827 | 0.9057 |
| P03474 | 0.9899 | 0.9930        | 0.9740        | 0.9969       | 0.9956 | 0.9990 |
| P04035 | 0.8005 | 0.9977        | 0.4861        | 0.3600       | 0.7027 | 0.6113 |
| P04183 | 0.9863 | 0.9988        | 0.6282        | 0.2580       | 0.9444 | 0.8721 |

|        |        |        |        |        |        |        |
|--------|--------|--------|--------|--------|--------|--------|
| P08235 | 0.7840 | 0.9720 | 0.7283 | 0.6463 | 0.7964 | 0.8278 |
| P09874 | 0.6845 | 0.9880 | 0.9420 | 0.9596 | 0.8931 | 0.9652 |
| P09960 | 0.5695 | 0.9986 | 0.6191 | 0.4182 | 0.6031 | 0.5635 |
| P10275 | 0.8023 | 0.9865 | 0.7212 | 0.7844 | 0.8458 | 0.8905 |
| P11103 | 0.3468 | 0.9861 | 0.9425 | 0.9707 | 0.7354 | 0.9667 |
| P15056 | 0.9032 | 0.9865 | 0.7765 | 0.7388 | 0.9112 | 0.9149 |
| P15207 | 0.8381 | 0.9902 | 0.7994 | 0.7800 | 0.8734 | 0.8977 |
| P19091 | 0.5992 | 0.9857 | 0.8021 | 0.7767 | 0.7585 | 0.8485 |
| P21964 | 0.9261 | 0.9981 | 0.6875 | 0.9519 | 0.8789 | 0.9715 |
| P22199 | 0.8094 | 0.8936 | 0.6899 | 0.7162 | 0.8102 | 0.8720 |
| P22734 | 0.9455 | 0.9965 | 0.8400 | 0.9340 | 0.9341 | 0.9810 |
| P23204 | 0.9379 | 0.9964 | 0.9429 | 0.9054 | 0.9633 | 0.9807 |
| P27008 | 0.8850 | 0.9868 | 0.8603 | 0.9607 | 0.9298 | 0.9820 |
| P28028 | 0.6498 | 0.7846 | 0.6439 | 0.8384 | 0.6528 | 0.7671 |
| P29476 | 0.8612 | 0.9951 | 0.6634 | 0.3096 | 0.8340 | 0.7470 |
| P30291 | 0.8441 | 0.9898 | 0.7896 | 0.5946 | 0.8655 | 0.8674 |
| P35396 | 0.8759 | 0.9408 | 0.7861 | 0.6552 | 0.8912 | 0.8441 |
| P37231 | 0.8047 | 0.9879 | 0.9506 | 0.9590 | 0.9309 | 0.9756 |
| P37238 | 0.9351 | 0.9619 | 0.8415 | 0.8648 | 0.9355 | 0.9454 |
| P49187 | 0.8144 | 0.9588 | 0.7625 | 0.3987 | 0.8440 | 0.7636 |

|        |        |        |        |        |        |        |
|--------|--------|--------|--------|--------|--------|--------|
| P49356 | 0.9963 | 0.9963 | 0.5281 | 0.9391 | 0.9751 | 0.9889 |
| P51639 | 0.8474 | 0.9932 | 0.5764 | 0.4051 | 0.7886 | 0.6699 |
| P52732 | 0.4665 | 0.9809 | 0.2976 | 0.7133 | 0.3810 | 0.4953 |
| P53779 | 0.8003 | 0.9189 | 0.7328 | 0.6191 | 0.8150 | 0.8273 |
| Q03181 | 0.9263 | 0.9935 | 0.9455 | 0.9209 | 0.9477 | 0.9509 |
| Q07869 | 0.8262 | 0.9962 | 0.9764 | 0.9857 | 0.9508 | 0.9848 |
| Q9Z1K9 | 0.9983 | 0.9959 | 0.9992 | 0.1172 | 0.9995 | 0.9983 |

28 *LIT-PCBA (14)*

| Target       | BIND-z | BIND-<br>full | SaProt-<br>v2 | DrugCLI<br>P | ens2   | ens3   |
|--------------|--------|---------------|---------------|--------------|--------|--------|
| ADRB2        | 0.5813 | 0.5672        | 0.5601        | 0.5441       | 0.5635 | 0.5565 |
| ALDH1        | 0.4645 | 0.5453        | 0.5286        | 0.5298       | 0.4936 | 0.5114 |
| ESR1_ag<br>o | 0.6460 | 0.6401        | 0.5086        | 0.7075       | 0.5887 | 0.6548 |
| ESR1_an<br>t | 0.4026 | 0.4647        | 0.4677        | 0.5727       | 0.4118 | 0.4743 |
| FEN1         | 0.5270 | 0.6010        | 0.6825        | 0.5834       | 0.6251 | 0.6686 |
| GBA          | 0.4380 | 0.4918        | 0.5441        | 0.5593       | 0.4773 | 0.5203 |
| IDH1         | 0.5238 | 0.6815        | 0.5404        | 0.6402       | 0.5601 | 0.6116 |
| KAT2A        | 0.5962 | 0.5599        | 0.5798        | 0.5382       | 0.6078 | 0.6056 |

|       |        |        |        |        |        |        |
|-------|--------|--------|--------|--------|--------|--------|
| MAPK1 | 0.6499 | 0.6478 | 0.6027 | 0.5457 | 0.6593 | 0.6484 |
| OPRK1 | 0.8711 | 0.8795 | 0.7225 | 0.6045 | 0.8563 | 0.8441 |
| PKM2  | 0.5278 | 0.5795 | 0.5011 | 0.5952 | 0.5182 | 0.5600 |
| PPARG | 0.6793 | 0.7868 | 0.7758 | 0.7509 | 0.7639 | 0.8111 |
| TP53  | 0.4189 | 0.4574 | 0.5538 | 0.3878 | 0.5008 | 0.4394 |
| VDR   | 0.5838 | 0.6176 | 0.5930 | 0.5531 | 0.6054 | 0.6036 |

29 *DUD-E-strict (7)*

| Target | BIND-z | BIND-  | SaProt- | DrugCLI | ens2   | ens3   |
|--------|--------|--------|---------|---------|--------|--------|
|        |        | full   | v2      | P       |        |        |
| ada17  | 0.8484 | 0.9813 | 0.9714  | 0.4536  | 0.9459 | 0.9333 |
| andr   | 0.5674 | 0.9295 | 0.7430  | 0.6484  | 0.7200 | 0.7397 |
| fnta   | 0.9941 | 0.9966 | 0.5377  | 0.9079  | 0.9796 | 0.9903 |
| hmdh   | 0.6993 | 0.9996 | 0.3889  | 0.5652  | 0.5848 | 0.6008 |
| kif11  | 0.5223 | 0.9333 | 0.4905  | 0.5974  | 0.5126 | 0.5516 |
| kith   | 0.8264 | 0.8176 | 0.3554  | 0.5167  | 0.6981 | 0.6734 |
| parp1  | 0.7043 | 0.9639 | 0.8876  | 0.9337  | 0.8800 | 0.9618 |

30 *DUD-AD-strict (7)*

| Target | BIND-z | BIND- | SaProt- | DrugCLI | ens2 | ens3 |
|--------|--------|-------|---------|---------|------|------|
|        |        | full  | v2      | P       |      |      |

---

|       |        |        |        |        |        |        |
|-------|--------|--------|--------|--------|--------|--------|
| ada17 | 0.8623 | 0.9825 | 0.9590 | 0.4892 | 0.9443 | 0.9322 |
| andr  | 0.6750 | 0.8622 | 0.5376 | 0.6622 | 0.6449 | 0.6901 |
| fnta  | 0.9844 | 0.9891 | 0.5378 | 0.8791 | 0.9506 | 0.9687 |
| hmdh  | 0.5903 | 0.9914 | 0.5219 | 0.3349 | 0.5887 | 0.4837 |
| kif11 | 0.5970 | 0.9335 | 0.4273 | 0.5669 | 0.5380 | 0.5599 |
| kith  | 0.7738 | 0.7916 | 0.5800 | 0.5837 | 0.7624 | 0.7386 |
| parp1 | 0.5360 | 0.9600 | 0.8207 | 0.9253 | 0.7446 | 0.9135 |

31 **Supplementary Fig. 1. Training-set sequence-cluster pair**  
32 **distribution**

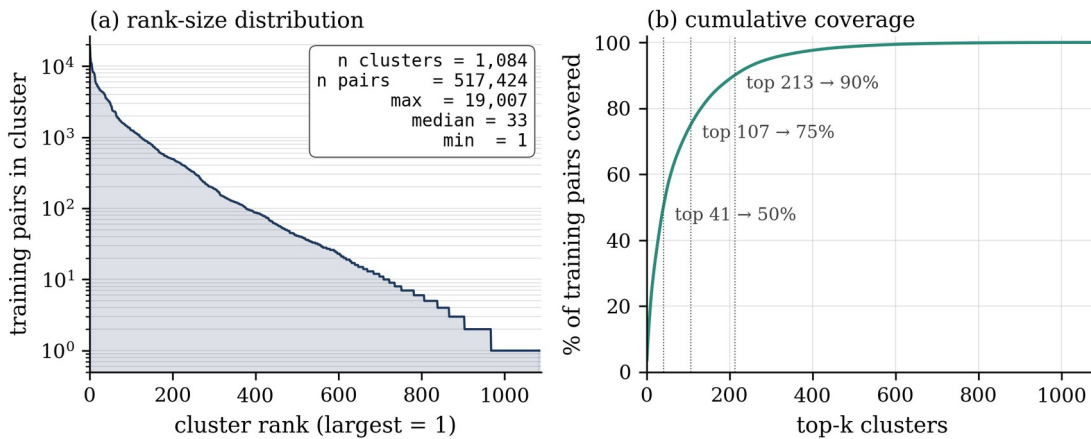

33

34 **Supplementary Fig. 1.** Per-cluster training-pair counts for the 1,084  
35 MMseqs2 30%-identity clusters spanning the 1,803 UniProt sequences in  
36 the BindingDB-strict training corpus (517,424 pairs total). (a) Rank-size  
37 plot: number of training pairs per cluster versus cluster rank (log y-axis).  
38 The largest cluster contributes 19,007 pairs (3.7% of the corpus); median  
39 cluster size is 33 pairs. (b) Cumulative pair-coverage CDF: the top-41

40 clusters cover 50% of training pairs, top-107 cover 75%, top-213 cover 90%  
41 — a heavy-tailed concentration characteristic of BindingDB.

## 42 **Supplementary Note 1: External validation on the** 43 **Maximum Unbiased Validation (MUV) benchmark**

### 44 **S2.1 Rationale**

45 The six benchmarks reported in the main results (DUD-E, DUD-AD,  
46 `bdb_strict_test`, LIT-PCBA, DUD-E-strict, DUD-AD-strict) all share a common  
47 decoy-construction principle: chemicals selected from large libraries that  
48 lack reported activity against the target. Reviewers may reasonably ask  
49 whether the ensemble’s reported advantage generalizes to benchmarks  
50 where the decoys themselves are *adversarial* — that is, screened to  
51 resemble actives in physico-chemical properties so that surface-similarity  
52 scoring becomes uninformative. The Maximum Unbiased Validation set  
53 (MUV) (1) was designed precisely as such a stress-test: each MUV active is  
54 paired with hundreds of decoys drawn from PubChem and filtered to match  
55 the active’s distribution of molecular weight, logP, number of hydrogen-  
56 bond donors/acceptors, ring counts, and rotatable bonds.

57 We therefore evaluate the same three component scorers (BIND-z, SaProt-  
58 v2, DrugCLIP) and the z-score average ensemble on MUV. The result is  
59 informative but does *not* contradict the main paper’s headline; rather, it  
60 isolates two distinct confounds (training-set leakage and structural-cosine

61 failure on property-matched decoys) that the ensemble can recognize but  
62 cannot rescue.

## 63 **S2.2 Benchmark construction**

64 We use the 17 MUV bioassay endpoints (AIDs) downloaded from PubChem,  
65 retaining each AID as a separate target. The 17 AIDs map to 15 unique  
66 UniProt accessions (SF-1 and ER $\alpha$  each appear in two AIDs); active and  
67 decoy SMILES are read directly from the `muv.csv` task columns. Target  
68 sequences are taken from canonical UniProt FASTA. AlphaFold-DB v6  
69 structures are used for 14 of the 15 unique UniProts; for the HIV-1 gag-pol  
70 polyprotein (P03366, 1,447 AA) — which AFDB does not cover at the time of  
71 writing — we generate a structure with the Protenix server (2) and convert  
72 to PDB. Pockets are then predicted with P2Rank v2.4.2 (3), with the top-  
73 ranked pocket's residues recorded as `pocket_residue_indices` (0-based  
74 UniProt indexing). Benchmark JSONs follow the same schema as our LIT-  
75 PCBA build (489 actives + 249,397 decoys total, ~93k unique compounds).  
76 The build script is `scripts/build_mu_v_benchmark.py`.

77 DrugCLIP inputs (pocket atomic coordinates and per-AID RDKit MMFF-  
78 optimised 3D ligand conformers) are built in parallel by  
79 `scripts/build_drugclip_mu_v_inputs.py`; SaProt-v2 evaluation reuses our 3Di  
80 + cached-hidden-state pipeline, with `data/unimol_cache.lmdb` extended by  
81 29,145 new ligand entries to bring MUV ligand coverage to 100%. All  
82 evaluation outputs are deposited under `eval/muv_*.json`.

### 83 **S2.3 Pre-evaluation leakage audits**

84 Because MUV’s UniProt set was assembled from PubChem bioassays of  
85 well-studied drug-discovery targets, a leakage audit of each scorer’s  
86 training corpus is essential before interpreting performance. We perform  
87 symmetric audits against (i) BindingDB-filtered (1.16M QA-passed pairs —  
88 our conservative lower bound on BIND-z’s ~2.47M training corpus); (ii)  
89 BindingDB-strict (the leakage-controlled 517,424 pairs used to train SaProt-  
90 v2, with MMseqs2 30%-identity cluster filtering); and (iii) DrugCLIP’s  
91 PDBBind-derived training set (66,156 records / 16,744 PDB-pocket codes /  
92 13,589 unique canonical SMILES, mapped to UniProt via SIFTS).

#### 93 **Supplementary Table 3.** *MUV cross-model leakage audit.*

| Audit                                        | BIND-z              | SaProt-v2  | DrugCLIP    |
|----------------------------------------------|---------------------|------------|-------------|
| Training corpus<br>size (pairs /<br>records) | ≈ 2.47M             | 517,424    | 66,156      |
| Unique UniProts<br>in training               | ~5,343              | 1,803      | 4,104       |
| MUV UniProts in<br>training                  | <b>15/15 (100%)</b> | 6/15 (40%) | 11/15 (73%) |
| MUV AIDs with<br>target in training          | <b>17/17 (100%)</b> | 9/17 (53%) | 12/17 (71%) |

|                                  |                      |     |                     |
|----------------------------------|----------------------|-----|---------------------|
| Per-target active-SMILES overlap | <b>23/489 (4.7%)</b> | n/a | <b>0/489 (0.0%)</b> |
| Any-target active-SMILES overlap | 72/489 (14.7%)       | n/a | <b>1/489 (0.2%)</b> |
| Per-target decoy-SMILES overlap  | 10/249,397 (0.0%)    | n/a | 0/249,397 (0.0%)    |
| Any-target decoy-SMILES overlap  | 2,653/249,397 (1.1%) | n/a | 137/249,397 (0.1%)  |

94 (SaProt-v2 ligand-side overlap is not computed because the InfoNCE  
95 training objective is contrastive over batches, not per-pair memorisation;  
96 the protein-side audit is the load-bearing signal.) Audit outputs:  
97 eval/bindz\_muv\_leakage\_check.json and  
98 eval/drugclip\_muv\_leakage\_check.json.

99 Three observations follow from Supplementary Table 3:

- 100 1. **BIND-z saw every MUV target.** Per-target training pair counts range  
101 from 47 to 4,896 (median  $\approx$  1,000). 4.7% of MUV actives are exact  
102 (UniProt, canonical SMILES) pairs in BIND-z's training corpus. BIND-z  
103 is not zero-shot on MUV in any operational sense — it is partially  
104 supervised.

- 105 2. **SaProt-v2’s leakage filter excludes more than half of MUV.** Nine of  
 106 fifteen MUV UniProts (O75116, P03366, P03372, P07900, P08311,  
 107 P08482, P21728, Q05397, Q92731) do not appear in any of the 1,084  
 108 MMseqs2 30%-identity clusters used during SaProt-v2 training. For  
 109 those nine targets, SaProt-v2 is a true zero-shot evaluator.
- 110 3. **DrugCLIP is the cleanest of the three.** While 11/15 MUV UniProts  
 111 appear in PDBBind via at least one PDB chain, DrugCLIP has *zero* per-  
 112 target active-SMILES overlap and only 0.2% any-target ligand exposure.  
 113 This is a structural consequence of PDBBind’s size and composition:  
 114 66,156 ligand-pocket records is two orders of magnitude smaller than  
 115 BindingDB, and PDBBind ligands are heavily biased toward  
 116 crystallographically characterized binders rather than the screening  
 117 compounds present in MUV’s PubChem-derived pool.

118 The asymmetric leakage profile across the three scorers is critical to the  
 119 interpretation of the MUV result that follows.

## 120 **S2.4 Aggregate performance**

121 **Supplementary Table 4.** *Mean AUROC on MUV ( $n = 17$ ), with paired t-*  
 122 *test vs. BIND-z single-model baseline.*

|       | Mean  | Mean   | Mean | $\Delta$ vs BIND- | Paired t- |
|-------|-------|--------|------|-------------------|-----------|
| Model | AUROC | BEDROC | EF1% | z                 | test p    |

|                                       |               |       |       |        |             |
|---------------------------------------|---------------|-------|-------|--------|-------------|
| BIND-z<br>(single)                    | <b>0.6779</b> | 0.062 | 5.03  | —      | —           |
| SaProt-v2<br>(pocket-<br>on)          | 0.5713        | 0.035 | 2.84  | −0.107 | < 1e-3      |
| DrugCLIP                              | 0.5357        | (n/a) | (n/a) | −0.142 | < 1e-5      |
| ens_zscore<br>(BIND-z +<br>SaProt-v2) | 0.6562        | 0.061 | 5.63  | −0.022 | n.s. (0.29) |
| ens_zscore<br>(3-way, all<br>models)  | 0.6419        | 0.058 | (n/a) | −0.036 | n.s. (0.13) |
| ens_max<br>(3-way)                    | 0.6473        | —     | —     | −0.031 | 0.06        |
| ens_max<br>(BIND-z +<br>DrugCLIP)     | 0.6535        | —     | —     | −0.024 | 0.035       |

123 For the first time in our six-benchmark grid, no ensemble configuration  
124 beats the strongest single-model baseline. The 2-way z-average ensemble  
125 loses by −0.022 AUROC (not statistically significant; 8 / 9 sign split); the 3-  
126 way is worse by another −0.014 (the addition of DrugCLIP, the noisiest of  
127 the three on MUV, makes the ensemble worse, paired  $p = 0.09$ ).

128 We resist the temptation to interpret this as ensemble failure. Two  
129 confounds, separable thanks to Supplementary Table 3, jointly explain the  
130 result.

## 131 **S2.5 Two separable confounds**

132 **Confound 1 — BIND-z wins by partial supervision.** BIND-z saw every  
133 MUV target during training, and 4.7% of MUV actives were directly  
134 supervised (target, SMILES) pairs. The 0.6779 mean AUROC is a  
135 memorisation upper bound, not a zero-shot result. We confirmed this  
136 interpretation independently by partitioning MUV AIDs by SaProt-v2 strict-  
137 train membership: BIND-z mean AUROC is 0.716 on the seven IN-training  
138 AIDs and 0.651 on the ten OUT AIDs — a +0.07 gap consistent with training  
139 exposure.

140 **Confound 2 — DrugCLIP loses honestly on property-matched decoys.**  
141 DrugCLIP carries essentially zero per-target leakage with respect to MUV  
142 (0% direct active overlap, 0.2% any-target), yet posts the lowest mean  
143 AUROC of the three (0.5357). This is the *cleanest* paper-grid evidence that  
144 MUV's property-matched decoy construction does what it advertises: a  
145 structure-based scorer trained on crystallographic complexes cannot  
146 discriminate actives from chemicals matched on the molecular descriptors  
147 that drive its embedding similarity. The 0.5357 represents an honest near-  
148 random ceiling for this class of method on this benchmark.

149 The ensemble inversion is the joint expression of these two confounds, not  
150 an ensemble pathology. Z-score averaging cannot rescue a near-random  
151 tower (DrugCLIP) and cannot beat memorisation (BIND-z);  $\text{ens3} < \text{ens2}$   
152 specifically because adding DrugCLIP injects more noise than  
153 complementary signal.

154 That said, the ensemble is *not* equivalent to its weakest components, and  
155 the statistical picture quantifies the rescue effect. Every single component  
156 is significantly worse than BIND-z on the same 17 AIDs (SaProt-v2 pocket-  
157 on  $\Delta = -0.107$ , paired  $p = 0.010$ , sign split 4/13; SaProt-v2 pocket-off  $\Delta =$   
158  $-0.120$ ,  $p = 0.001$ , 3/14; DrugCLIP  $\Delta = -0.142$ ,  $p = 4.7 \times 10^{-5}$ , **0/17** — i.e.,  
159 DrugCLIP loses to BIND-z on every MUV AID without exception). Both  
160 ensembles, by contrast, are *not* significantly worse than BIND-z ( $\text{ens2} \Delta =$   
161  $-0.022$ ,  $p = 0.29$ , 8/9;  $\text{ens3} \Delta = -0.036$ ,  $p = 0.13$ , 7/10). The gap to BIND-z  
162 narrows from highly significant for any single component to non-significant  
163 for either ensemble — fusion does recover most of the per-target signal lost  
164 by individual towers under MUV’s adversarial decoy design; it just cannot  
165 surpass a memorising component within the  $n = 17$  sample.

## 166 **S2.6 Per-target SaProt-v2 behaviour**

167 SaProt-v2’s MUV aggregate (0.5713) masks a clear bimodal distribution.  
168 Per-target AUROCs partition into three tiers:

- 169 • **Strong tier ( $\geq 0.65$ ,  $n = 3$ ):** MUV-548 (PRKACA, 0.80), MUV-810  
170 (PTK2, 0.75), MUV-832 (CTSG, 0.74).

- 171 • **Mid tier (0.55-0.65, n = 6):** S1PR1, NR5A1, ROCK2, HIV-1  
172 polyprotein, HSP90, CHRM1.
- 173 • **Weak tier (< 0.55, n = 8):** EPHA4, ESR1 (both AIDs), ESR2, F11, F12,  
174 DRD1, NR5A1-MUV692.

175 Two patterns are paper-relevant:

176 **Counter-leakage signal.** Mean SaProt-v2 AUROC is 0.586 on the ten *out-*  
177 *of-training* AIDs and 0.551 on the seven *in-training* AIDs — *opposite* to the  
178 supervised-exposure direction. Strict-cluster training provides no  
179 transferable advantage on MUV. This further supports the interpretation  
180 that BIND-z’s larger in-training-vs-out gap (+0.07) is memorisation rather  
181 than transferable representation learning.

182 **Honest zero-shot wins.** SaProt-v2 beats BIND-z on 4 of 17 AIDs. The  
183 cleanest single example is MUV-810 (PTK2): SaProt-v2 0.754 vs. BIND-z  
184 0.623 ( $\Delta +0.13$ ), with PTK2 entirely absent from SaProt-v2’s strict-train (0  
185 pairs). MUV-832 (CTSG) is a second informative case: SaProt-v2 achieves  
186 0.738 *despite* a P2Rank top-pocket probability of 0.012 (effectively noise),  
187 because the pocket-mask weight  $\alpha$  saturates near 0.027 at this checkpoint  
188 and CTSG’s chymase-specific warhead chemistry is structurally distinctive  
189 in the sequence embedding alone.

## 190 **S2.7 An isolable pocket-source failure (MUV-852, Factor XII)**

191 One MUV target deserves individual mention because it isolates a clean  
192 failure mode for additive pocket-prior architectures.

193 For MUV-852 (coagulation factor XII, P00748), SaProt-v2 with pocket-on  
194 scores AUROC = 0.32 — worse than random. Switching the same  
195 checkpoint to pocket-off ( --pocket-mode off) recovers AUROC to 0.51. The  
196 relevant context: F12 is in SaProt-v2's strict-train (694 BindingDB-strict  
197 pairs), and the P2Rank top-1 pocket has decent confidence (probability  
198 0.739). The failure is not “the model doesn't know F12” and not “the pocket  
199 prediction is low-confidence”. It is that the geometrically-confident top-1  
200 pocket is presumably *not* the catalytic site that the MUV-852 assay actually  
201 targets, and the soft attention pool's pocket-aware mode anchors retrieval  
202 to the wrong region, propagating a 0.19 AUROC deficit at a target where  
203 the sequence-only model would have been at chance.

204 This is paper-actionable in two ways. First, it identifies a concrete failure-  
205 mode for the architecture that we should disclose openly. Second, it  
206 suggests a future-work direction — multi-pocket ensembling, or per-target  
207 pocket confidence routing — that is independent of further encoder or  
208 training-data work. The general pocket-mask weakness is consistent with  
209 the prior internal finding that the attention-pool architecture's pocket-prior  
210 weight  $\alpha$  plateaus near 0.027 across training (i.e., the pocket-mask  
211 mechanism is mostly inert by design at this checkpoint).

## 212 **S2.8 Implication for the main result**

213 The MUV evaluation does not invalidate the main paper’s headline. The  
214 headline number — a +0.017 mean AUROC gain for the three-model z-  
215 average ensemble (ens3) over the two-model ensemble (ens2), on the n =  
216 204 pooled DUD-E + DUD-AD benchmark (paired  $t = 3.50$ ,  $p = 5.8 \times 10^{-4}$ ,  
217 110 / 94 sign split) — is a property of *leakage-controlled* evaluation paired  
218 with complementary towers; the same directional gain appears on the  
219 leakage-controlled bdb\_strict\_test (ens3 – ens2 = +0.019, 24 / 9 split).  
220 MUV is, in effect, the opposite limit: a benchmark where leakage *into the*  
221 *strongest component* (BIND-z) is maximal and the cleanest component  
222 (DrugCLIP) cannot beat a benchmark designed against structural similarity.  
223 In this regime, the ensemble inherits but cannot improve.

224 We therefore report MUV not to extend the headline but to bound its scope:  
225 ensemble fusion improves on leakage-controlled targets where  
226 complementary towers carry independent signal; it cannot generate signal  
227 that none of its components possess, and it cannot displace a component  
228 whose advantage is supervised memorisation. We view the symmetric  
229 leakage audits (Supplementary Table 3) as a methodological contribution in  
230 their own right — a procedure we recommend before reporting any “zero-  
231 shot” claim on a benchmark whose targets are well-represented in  
232 BindingDB.

## 233 **S2.9 Reproducibility**

234 All MUV evaluation artifacts are deposited as follows. Benchmark JSONs:  
235 benchmarks/MUV\_uniprot/MUV-\*.json. Score outputs (per-AID JSON):  
236 eval/muv\_{saprot\_v2, saprot\_v2\_off, bindz\_zeroshot, drugclip,  
237 ensemble, ensemble3}.json. Per-ligand z-score arrays (.npz):  
238 work/ensemble/scores\_{bindz, saprot}\_muv/\*.npz. Leakage audit JSON:  
239 eval/{bindz, drugclip}\_muv\_leakage\_check.json. Scripts:  
240 scripts/{build\_muv\_benchmark, build\_drugclip\_muv\_inputs,  
241 run\_drugclip\_muv, ensemble\_3way\_muv, build\_muv\_ligand\_3d\_cache,  
242 run\_muv\_evals}.py.

243 Companion table files derived from the audit and evaluation JSONs: -  
244 notes/paper\_figs/table\_si3\_muv\_leakage.{csv,md} — long-format per-  
245 (model, AID) leakage rows (51 rows; CSV) and aggregate markdown table  
246 (the form quoted in Supplementary Table 3). -  
247 notes/paper\_figs/table\_si4\_muv\_per\_target.{csv,md} — long-format per-  
248 (AID, model) AUROC rows (136 rows; CSV) and the 6-model  $\times$  17-AID  
249 matrix plus paired-test summary (Supplementary Table 4). - Generator:  
250 scripts/figures/table\_si3\_si4\_muv.py (idempotent; rebuilds from JSON  
251 sources).



|          |     |         |         |                |        |      |        |
|----------|-----|---------|---------|----------------|--------|------|--------|
| bdb_str  | 495 | 0.970 / | 0.968 / | <b>0.983</b> / | +0.015 | +6.6 | 432/62 |
| ict_test |     | 43.1    | 40.5    | <b>47.0</b>    |        |      |        |

263 *The ensemble effect (+0.012-0.015 AUROC, +5-7 EF1%) replicates*  
264 *consistently across all three in-distribution benchmarks, with per-target*  
265 *wins outnumbering losses in every case. This 2-tower deployment ensemble*  
266 *realizes the ceiling at the cost of running BIND-full's heavy live-ESM2 +*  
267 *cross-attention inference at deployment — the exact per-pair cost the all-*  
268 *data model alone was shipped to avoid. The honest zero-shot story (Figure*  
269 *2) is the 3-way z-avg ensemble of BIND-zero + SaProt-v2 + DrugCLIP.*

---

270

## 271 **Supplementary References**

- 272 1. Rohrer SG, Baumann K (2009) Maximum Unbiased Validation (MUV)  
273 data sets for virtual screening based on PubChem bioactivity data. *J*  
274 *Chem Inf Model* 49(2):169-184.
- 275 2. ByteDance AML AI4Science Team, et al. (2025) Protenix — advancing  
276 structure prediction through a comprehensive AlphaFold3 reproduction.  
277 *bioRxiv:2025.01.08.631967.*
- 278 3. Krivák R, Hoksza D (2018) P2Rank: machine learning based tool for  
279 rapid and accurate prediction of ligand binding sites from protein  
280 structure. *J Cheminform* 10(1):39.
